# Supplementary material
Source: publisher figshare collection journal article supplement (https://frontiersin.figshare.com/ndownloader/files/21225735)

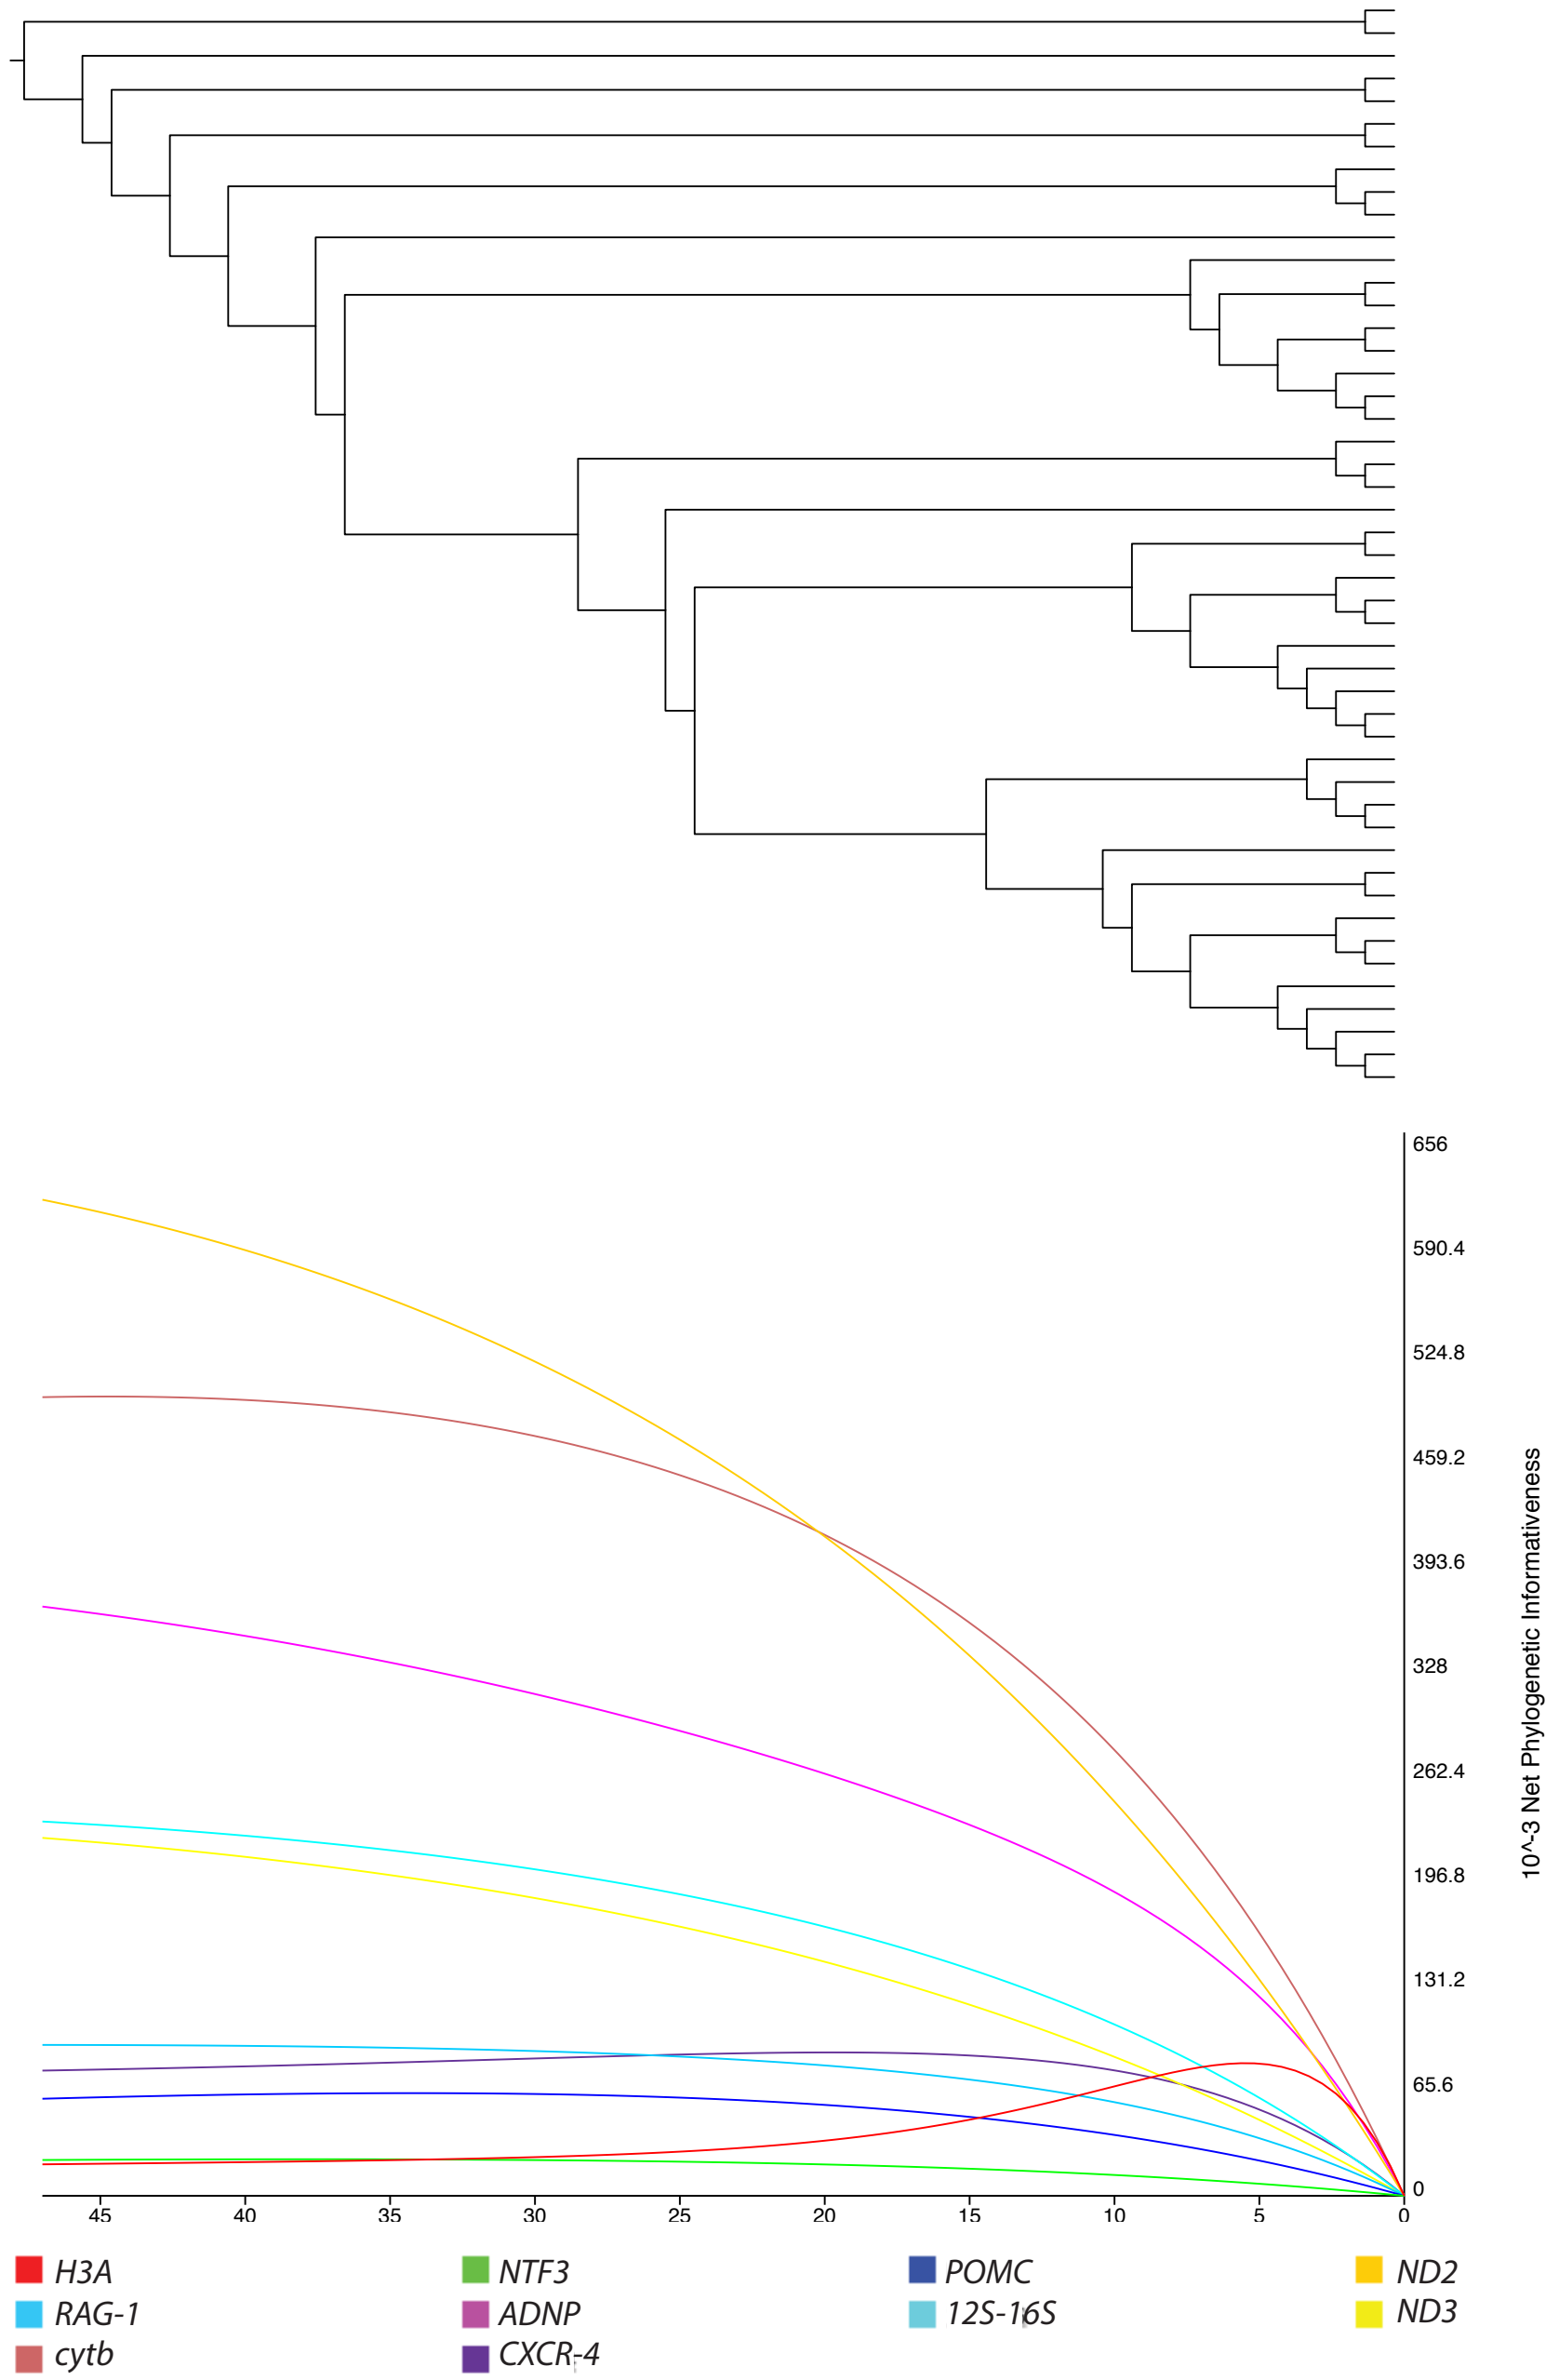

Supplement: Supplementary file 1 [file 21225735]
